# Supplementary material for: Characterisation of fungal contamination sources for use in quality management of cheese production farms in Korea
Source: PubMed Central journal article supplement (PMC7206383; doi:10.5713/ajas.19.0553), 2019-10-21
Supplement: ajas-19-0553-suppl.pdf [file ajas-19-0553-suppl.pdf]

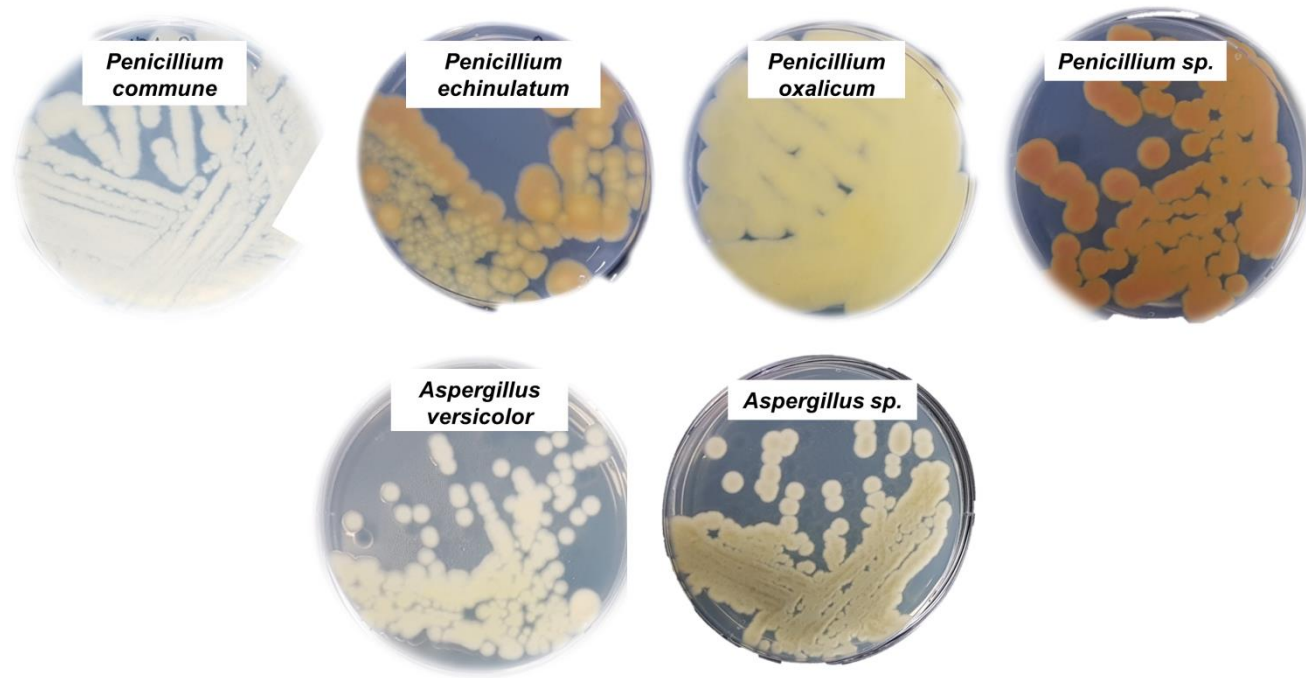

1

2

3

**Supplementary Figure 1. Colony morphology of the predominant fungal species isolated in dairy farms**
